# Supplementary material
Source: Springer Nature journal article supplement (https://www.springermedizin.de/resource/supplementary/12955_2007_399_MOESM4_ESM.pdf/9560324)

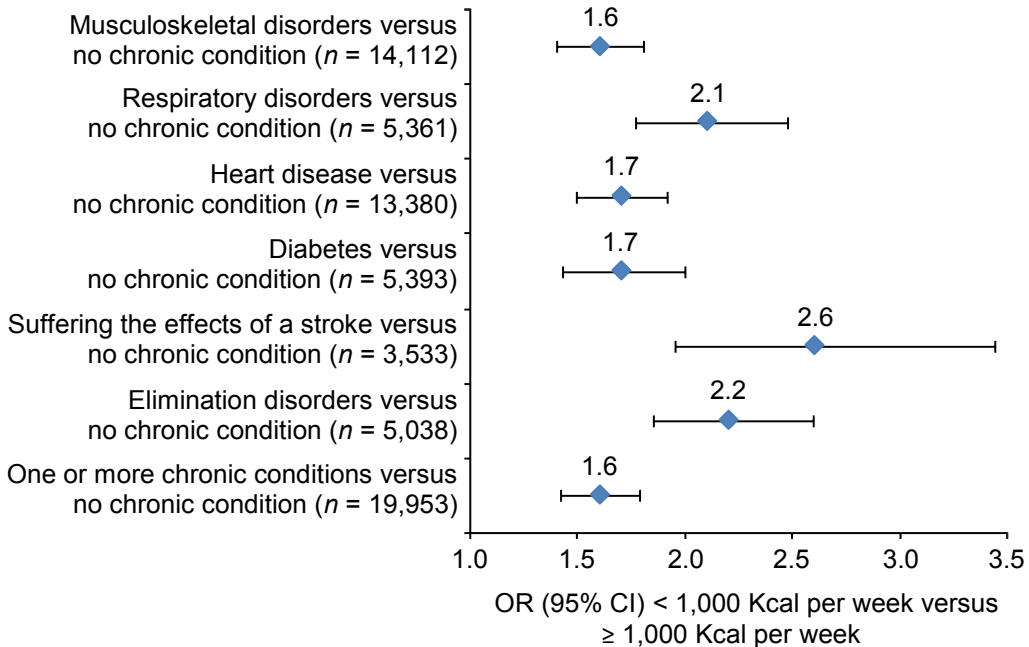

Supplement: MOESM4 [file 9560324]
